# Supplementary material for: NS2 proteases from hepatitis C virus and related hepaciviruses share composite active sites and previously unrecognized intrinsic proteolytic activities
Source: PubMed Central journal article supplement (PMC5819835; doi:10.1371/journal.ppat.1006863), 2018-02-07
Supplement: ppat.1006863.s001.pdf [file ppat.1006863.s001.pdf]

**S1 Table. Accession numbers and protein boundaries of the hepaciviruses used in this study.**

| <b>Virus</b>           | <b>Accession number</b> | <b>NS2 coding sequence</b> | <b>NS3<sub>N</sub> coding sequence</b> |
|------------------------|-------------------------|----------------------------|----------------------------------------|
| <b>BHV PDB-452</b>     | KC796090                | nt 2504-3154               | nt 3155-3796                           |
| <b>GBV-B</b>           | AY243572                | nt 2642-3265               | nt 3266-3835                           |
| <b>GHV-1 BWC08</b>     | KC551800                | nt 2416-3051               | nt 3052-3699                           |
| <b>HCV H77 (1a)</b>    | NC_004102               | nt 2769-3419               | -                                      |
| <b>HCV Con1 (1b)</b>   | AJ238799                | nt 2769-3419               | -                                      |
| <b>HCV J6 (2a)</b>     | AF177036                | nt 2780-3430               | -                                      |
| <b>HCV JFH1 (2a)</b>   | AB047639                | nt 2780-3430               | nt 3431-4069                           |
| <b>NPHV H3-011</b>     | JQ434008                | nt 2758-3408               | nt 3409-4047                           |
| <b>RHV NLR07-oct70</b> | KC411784                | nt 2535-3131               | nt 3132-3770                           |

Boundaries of NS2 and NS3<sub>N</sub> coding sequences used in constructs are indicated by their nucleotide (nt) positions within respective cDNAs.
