# Supplementary material for: NS2 proteases from hepatitis C virus and related hepaciviruses share composite active sites and previously unrecognized intrinsic proteolytic activities
Source: PubMed Central journal article supplement (PMC5819835; doi:10.1371/journal.ppat.1006863), 2018-02-07
Supplement: ppat.1006863.s002.pdf [file ppat.1006863.s002.pdf]

**S2 Table. Predicted molecular masses of hepacivirus polypeptides**

|                        | <b>NS2-NS3<sub>N</sub>-ST</b> |                | <b>NS3<sub>N</sub>-ST</b> |                | <b>ΔN(NS2)-NS3<sub>N</sub>-ST</b> |                |
|------------------------|-------------------------------|----------------|---------------------------|----------------|-----------------------------------|----------------|
|                        | Length                        | Molecular mass | Length                    | Molecular mass | Length                            | Molecular mass |
| <b>BHV PDB-452</b>     | 462 aa                        | 49.9 kDa       | 245 aa                    | 25.7 kDa       | 375 aa                            | 39.9 kDa       |
| <b>GBV-B</b>           | 429 aa                        | 46.6 kDa       | 221 aa                    | 23.0 kDa       | 345 aa                            | 36.9 kDa       |
| <b>GHV-1 BWC08</b>     | 459 aa                        | 50.3 kDa       | 247 aa                    | 26.7 kDa       | 372 aa                            | 40.7 kDa       |
| <b>HCV JFH1 (2a)</b>   | 461 aa                        | 49.0 kDa       | 244 aa                    | 25.3 kDa       | 369 aa                            | 38.8 kDa       |
| <b>NPHV H3-011</b>     | 461 aa                        | 50.2 kDa       | 244 aa                    | 25.2 kDa       | 369 aa                            | 39.5 kDa       |
| <b>RHV NLR07-oct70</b> | 443 aa                        | 48.0 kDa       | 244 aa                    | 25.6 kDa       | 362 aa                            | 39.0 kDa       |

Length in amino acids (aa) and predicted molecular masses in kilodaltons (kDa) of NS2-NS3<sub>N</sub>-ST and ΔN(NS2)-NS3<sub>N</sub>-ST precursors and NS3<sub>N</sub>-ST cleaved products are indicated for the different hepaciviruses.
